# Supplementary material for: In Vitro Antifungal Activity of Selected Essential Oils against Drug-Resistant Clinical Aspergillus spp. Strains
Source: MDPI journal article supplement (doi:10.3390/molecules28217259), 2023-10-25
Supplement: s1 [file s1]

**Table S1** Essential oils used and their major components

| Essential oil                   |                                |                               |                            |                                 |                             |                            |                                     |                                  |                           |                              |
|---------------------------------|--------------------------------|-------------------------------|----------------------------|---------------------------------|-----------------------------|----------------------------|-------------------------------------|----------------------------------|---------------------------|------------------------------|
| Clove                           | Eucalyptus                     | Geranium                      | Hybrid lavender            | Lavender                        | Lemon                       | Lemongrass                 | Neroli                              | Oregano                          | Thyme red                 | Tea tree                     |
| Major components                |                                |                               |                            |                                 |                             |                            |                                     |                                  |                           |                              |
| 78.91%<br>Eugenol               | 80.64%<br>1-8 Cineole          | 33.22%<br>Citronellal + Neral | 33.83%<br>Linalol          | 27.11%<br>Linalol               | 69.25%<br>Limonene          | 22.64%<br>Geraniol         | 31.49%<br>Linalol                   | 62.61%<br>Carvacrol              | 26.5%<br>Thymol           | 35.88%<br>Terpinen-4-ol      |
| 11.64%<br>Eugenyl acetate       | 10.41%<br>Limonene             | 15.56%<br>Geraniol-formate    | 27.43 %<br>Linalyl acetate | 24.4%<br>Linalyl acetate        | 11.37%<br>$\beta$ -pinene   | 7.74%<br>Limonene          | 17.32%<br>$\beta$ -Pinene           | 12.36%<br>$\rho$ -cymene         | 16.2%<br>$\rho$ -Cymene   | 19.65%<br>$\gamma$ -Terpinen |
| 6.04%<br>$\beta$ -Caryophyllene | 3.65%<br>$\rho$ -Cymene        | 5.71%<br>iso-menthone         | 7.10%<br>Camphor           | 9.78%<br>$\beta$ -Ocimene       | 7.86%<br>$\gamma$ -Terpinen | 7.66%<br>Canphene          | 15.76%<br>Limonene                  | 3-9%<br>$\gamma$ -Terpinen       | 13.2%<br>Limonene         | 8.64%<br>$\alpha$ -Terpinen  |
| 0.69%<br>$\alpha$ -Humulene     | 2.52%<br>$\alpha$ -Pinene      | 4.19%<br>Linalol              | 4.84%<br>1,8 Cineole       | 5.36%<br>$\beta$ -Caryophyllene | 1.98%<br>Sabinene           | 6.81%<br>Methyl isoeugenol | 6.67%<br>$\beta$ -Ocimene           | 0.5-5%<br>Thymol                 | 11.5%<br>$\alpha$ -Pinene | 4.61%<br>$\rho$ -cymene      |
| 0.27%<br>$\alpha$ -Copaene      | 0.49%<br>$\alpha$ -Phellandral |                               | 4.18%<br>Borneol           | 5.11%<br>4-Terpineol            | 1.75%<br>$\alpha$ -Pinene   | 5.90%<br>Geranyl acetate   | 4.04%<br>Linalyl acetate + geraniol | 0.5-4%<br>$\beta$ -Caryophyllene | 7.8%<br>Carvacrol         | 4.07%<br>1,8-Cineole         |
|                                 |                                |                               |                            |                                 |                             |                            |                                     |                                  | 0.1-0.5%<br>Eugenol       |                              |
